# Supplementary material for: An efficient timer and sizer of biomacromolecular motions
Source: bioRxiv or medRxiv preprint supplement (doi:10.1101/384511), 2019-04-11
Supplement: Supplementary file [file 384511-2.pdf]

**Table S1. The top 50 slowest ribosomal motions characterized by ANM**

|                       | ANM Mode Index | Eigenvalues | Estimated Time Scale ( $\mu\text{s}$ ) |
|-----------------------|----------------|-------------|----------------------------------------|
| Slowest motion        | 1              | 4.46E-05    | 14293679.65                            |
|                       | 2              | 6.50E-05    | 7033919.39                             |
|                       | 3              | 8.38E-05    | 4352815.56                             |
|                       | 4              | 1.17E-04    | 2320270.70                             |
|                       | 5              | 3.25E-04    | 335825.34                              |
|                       | 6              | 4.08E-04    | 219343.56                              |
|                       | 7              | 5.57E-04    | 121698.60                              |
|                       | 8              | 7.64E-04    | 67024.34                               |
|                       | 9              | 8.93E-04    | 49911.72                               |
|                       | 10             | 1.21E-03    | 28009.81                               |
|                       | 11             | 1.50E-03    | 18632.15                               |
|                       | 12             | 3.69E-03    | 3419.05                                |
|                       | 13             | 3.94E-03    | 3018.11                                |
|                       | 14             | 4.07E-03    | 2840.08                                |
|                       | 15             | 5.35E-03    | 1696.67                                |
|                       | 16             | 6.34E-03    | 1232.63                                |
|                       | 17             | 7.45E-03    | 907.07                                 |
|                       | 18             | 8.56E-03    | 698.76                                 |
|                       | 19             | 9.20E-03    | 609.14                                 |
|                       | 20             | 1.10E-02    | 433.26                                 |
|                       | 21             | 1.12E-02    | 420.91                                 |
|                       | 22             | 1.22E-02    | 358.64                                 |
|                       | 23             | 1.62E-02    | 208.55                                 |
|                       | 24             | 1.73E-02    | 185.47                                 |
| Ratcheting motion     | 25             | 1.86E-02    | 160.73                                 |
|                       | 26             | 1.91E-02    | 153.34                                 |
| L1 stalk motion       | 27             | 2.10E-02    | 128.19                                 |
| L1 stalk motion       | 28             | 2.33E-02    | 105.09                                 |
|                       | 29             | 2.54E-02    | 89.37                                  |
|                       | 30             | 2.62E-02    | 84.47                                  |
|                       | 31             | 2.76E-02    | 76.61                                  |
| Head swiveling motion | 32             | 2.90E-02    | 69.91                                  |
|                       | 33             | 3.15E-02    | 59.47                                  |
|                       | 34             | 3.51E-02    | 48.67                                  |
|                       | 35             | 3.81E-02    | 41.70                                  |
|                       | 36             | 4.17E-02    | 35.11                                  |
|                       | 37             | 4.31E-02    | 33.03                                  |

|    |          |       |
|----|----------|-------|
| 38 | 5.26E-02 | 22.64 |
| 39 | 5.32E-02 | 22.16 |
| 40 | 5.56E-02 | 20.36 |
| 41 | 5.69E-02 | 19.52 |
| 42 | 6.03E-02 | 17.50 |
| 43 | 6.48E-02 | 15.28 |
| 44 | 6.56E-02 | 14.90 |
| 45 | 6.80E-02 | 13.92 |
| 46 | 6.91E-02 | 13.51 |
| 47 | 7.32E-02 | 12.14 |
| 48 | 7.37E-02 | 11.97 |
| 49 | 7.41E-02 | 11.84 |
| 50 | 7.47E-02 | 11.67 |

ANM is performed on the *Thermus thermophilus* 70S ribosome whose missing atoms, residues and subunits were patched using the individually solved subunits as templates [14]. The estimated time scales of the vibrational modes are obtained from the general time power law for ANM eigenvalues of three proteins (ubiquitin, FGF2 and HPNAP).
