# Supplementary material for: An efficient timer and sizer of biomacromolecular motions
Source: bioRxiv or medRxiv preprint supplement (doi:10.1101/384511), 2019-04-11
Supplement: Supplementary file [file 384511-3.pdf]

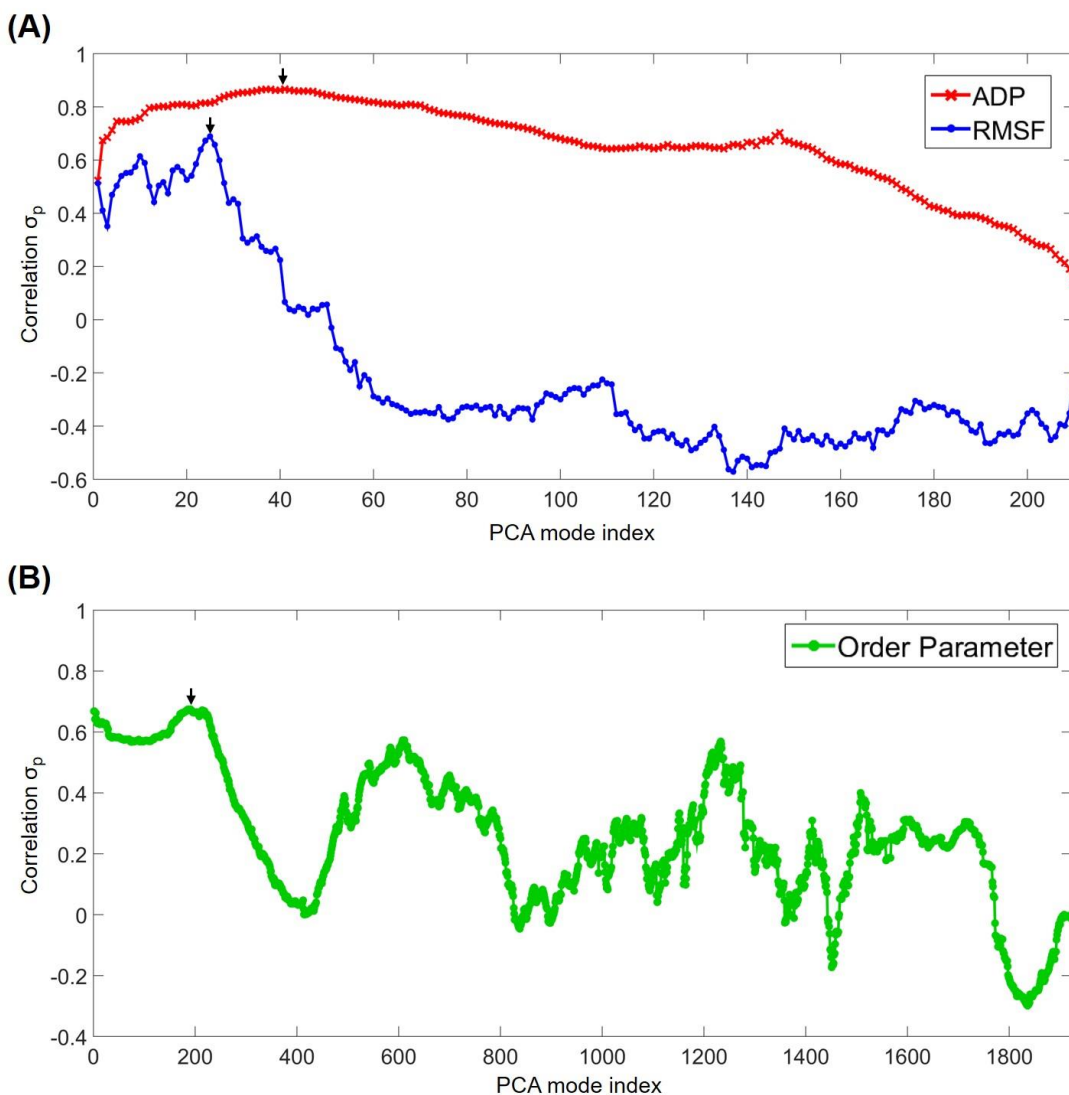

**Fig S2. The PC modes that best match the dynamics variables of ubiquitin.**

(A) The Pearson correlation coefficient between the anisotropic displacement parameters (ADP) profile assembled from all the PC modes higher or equal to a specific mode with the experimental ADP profile (PDB: 2GBJ) is shown in red crosses. Blue circles give correlation coefficients between RMSF profile derived from covariance comprising PC modes higher or equal to a given mode (Eq S8) and RMSF derived from a set of NMR-determined conformers (PDB: 1G6J). In (A), the PC modes are calculated using only  $C\alpha$  atoms (coarse-grained). (B) Pearson correlation coefficient between experimental NMR order parameters and order parameters estimated from the PCA of heavy-atoms with the backbone nitrogen's hydrogen atom. The black arrow indicates the PC mode with the highest correlation.
