# Supplementary material for: An efficient timer and sizer of biomacromolecular motions
Source: bioRxiv or medRxiv preprint supplement (doi:10.1101/384511), 2019-04-11
Supplement: Supplementary file [file 384511-4.pdf]

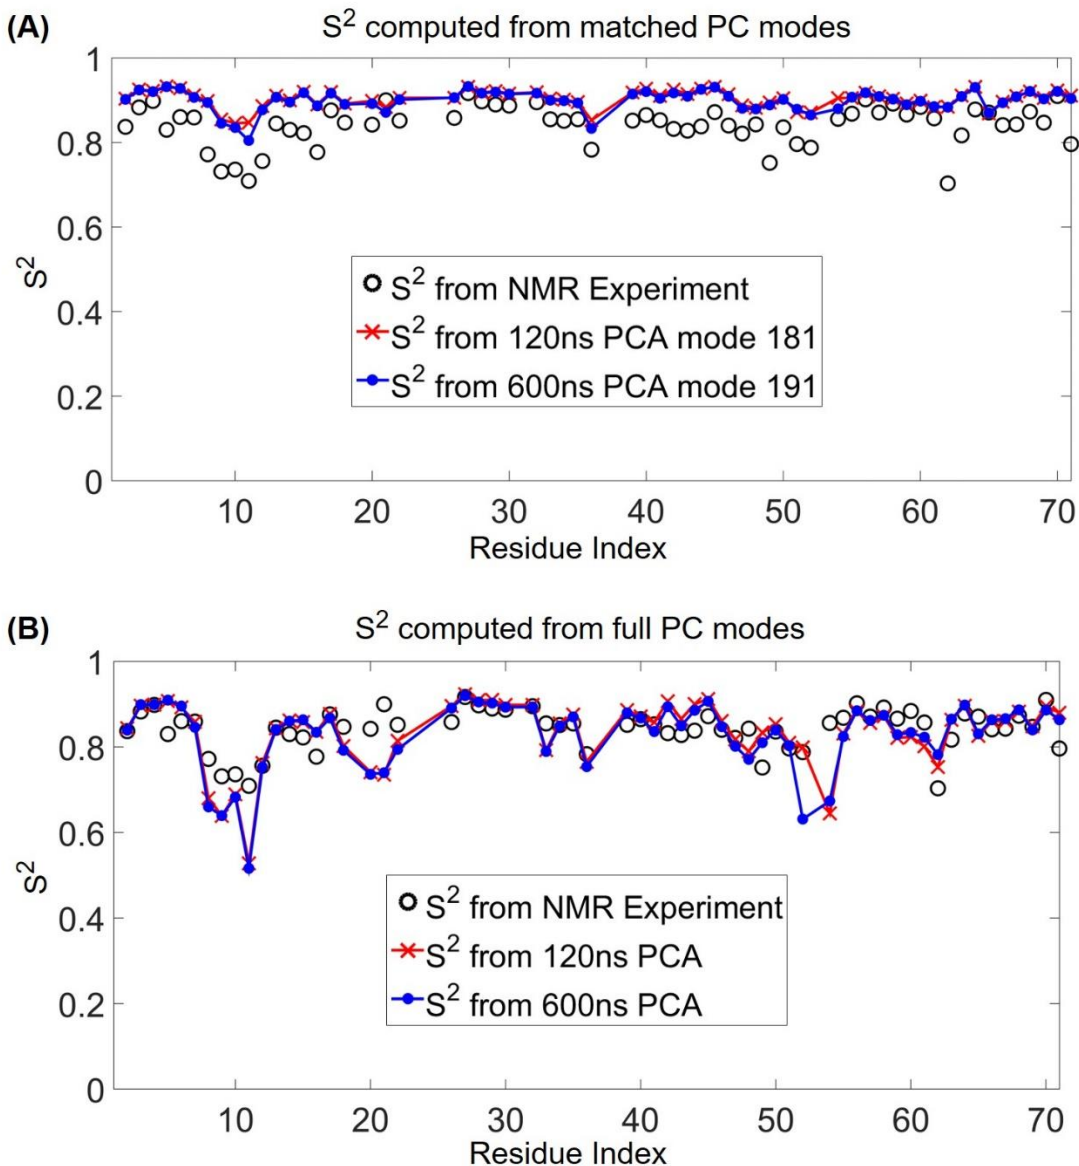

**Fig S3. NMR order parameters ( $S^2$ ) estimated from the 120 ns and 600 ns MD trajectories.** (A) The profiles are the order parameters derived from PC modes ( $k=181$  and  $191$  for 120 and 600ns simulations, respectively) that best-match the experimental data. One can obtain the time scales of 1.0 ns and 2.3 ns for the NMR-characterized  $S^2$  profile from the best-matched mode 181 and 191, respectively. (B) The profiles are order parameters derived from full PC modes ( $k=1$  in Eq S9). It is readily understandable that the longer the simulation is, the wider the spatial distribution (and therefore less order) of an atom would result.
